# Supplementary material
Source: PubMed Central journal article supplement (PMC5850863)
Supplement: msx159_supp.pdf [file msx159_supp.pdf]

## **Supplementary Material**

### **Giant reverse transcriptase-encoding transposable elements at telomeres**

Irina R. Arkhipova, Irina A. Yushenova, Fernando Rodriguez

Josephine Bay Paul Center for Comparative Molecular Biology and Evolution, Marine Biological Laboratory, Woods Hole, MA 02543, USA

#### **Supplementary Figure Legends**

**Fig. S1.** Examples of terminal DNA loss and recent *Terminon* transposition in *A. vaga*.

**(A)** Two allelic scaffolds, one of which underwent loss of *CzcO* cyclohexanone monooxygenase (now present only in single copy in the *A. vaga* genome), and was healed by telomeric repeat addition and by *Ath-W* retrotransposition. Truncation occurred within a MITE TE, leaving the thioester reductase intact. The allelic regions, including the common MITE fragment, are 97% identical. **(B)** Telomere M1 (fosmid 184A11 from (Gladyshev and Arkhipova 2007)) compared to scaffold 868 from the same clonal culture four years later (Flot, et al. 2013). Blue arrows, PCR primers initially used to amplify sphingomyelin phosphodiesterase (GDPD), which failed to amplify it in 2010. GNAT, N-acetyltransferase GNAT family. Each separate transposed unit in the head-to-tail array is marked with a bracket. Other notations are as in Fig. 1. **(C)** Regions of HHR-Q homology surrounding the ORFs coding for a TPR protein and a seven-transmembrane receptor (7tmr). An HHR-W2-containing fragment is present in direct orientation.

**Fig. S2.** Intragenomic coverage of *Terminon* families in the *A. vaga* reference assembly.

Reference scaffolds from Table 1, each diagrammed on the top, were used in BLASTN searches of the *A. vaga* genome assembly scaffolds at NCBI. The graphical overview of the search results is displayed in red. The coding potential for each family is shown in detail in Fig. S6.

**Fig. S3.** Phylogenetic analysis of *Terminon*-associated enzymatic ORFs.

Unrooted maximum-likelihood (ML) phylogenetic trees were generated using codon-based nucleotide sequence alignments. Clade support values >50% are shown at the nodes; scale bars, nucleotide substitutions per site. Taxon names are as follows: *Av*, *Adineta vaga*, black; *As*, *Adineta sp. 11* natural isolate, green; *Pr*, *Philodina roseola*, red. Asterisks indicate a defect in ORF; Oi-9i, number of introns. Intron gains and losses, when definable, are shown by black and gray triangles, respectively. **(A)** ML tree of catalytically active (ILOM, W, NT) and catalytically inactive (JVXY nc) RT ORFs. Frameshift-containing clades are marked by #. The alignment spans the extended core RT including the C-terminal thumb domain and the conserved N1-N3 motifs at the N-termini (Arkhipova 2006); ORF1 is not included in its entirety, and is presented separately in Fig. S7. **(B)** ML phylogram of GIY-YIG-like ORFs. Clades marked with purple and magenta brackets are both present in their respective families and have been co-evolving with the corresponding RTs. **(C)** ML trees of the full-length Rep-like ORFs (Rep-FL) were split into the N-terminal (HUH-Y2) and C-terminal (S3H) domains, and analyzed together with the respective Rep-N and Rep-C ORFs containing only one of the domains (underlined). The non-catalytic Rep-Nc clade is marked in cyan; /, 5'-truncation. Rep-FL ORFs were assigned to arbitrary clades a-d; number of introns varied from 0 to 7, and is not shown for simplicity.

**Fig. S4.** Programmed ribosomal frameshifting in *Athena* RTs.

**(A)** Limited sequence conservation in the region spanning the frameshift site in the ILOM and W clades (using MView visualization tool at EMBL-EBI). Note that in the O clade, a shift of the slippery sequence to the left (underlined) has occurred in *A. vaga* (see also panel D). **(B)** Secondary structure-based alignment showing the stem-loop conservation in the W and VX clades. **(C-E)** KnotInFrame *in silico* prediction of -1 frameshift sites, including slippery sequences and simple pseudoknots, in representative *A. vaga* families.

**Fig. S5.** Graphical representation of pairwise similarities between RT coding sequences from all families. Each family was plotted as nucleotide **(A)** and amino acid **(B)** sequence to highlight the contrasting degrees of divergence between ORF1 (N-termini) and RT. Representatives from each family (left column) from each of the four clades (right column, square brackets) on reference scaffolds (center column) were compared to their neighbors on the phylogram (Fig. 2) with Easyfig2.2.2. Identifiable cases of intron gains and losses are shown in (A) by yellow and blue triangles, respectively. The yellow box marks the location of the GDSL domain in the I clade; nc, lack of catalytic residues in RT-derived ORFs. The position of the frameshifting pseudoknot is marked by # on the top, and by vertical lines connected by a dotted line in other sequences in (A). The region corresponding to the core RT motifs 1-7 (Xiong and Eickbush 1990) is marked by a square bracket on the top (panel A, dashed line); motif RT5 is shown in white font.

**Fig. S6.** Structural organization of *Terminon* families.

Pairwise nucleotide sequence similarities are shown for individual scaffolds containing representatives of the W clade (A), NT clade (B-C), and ILOM clade (D). Scaffolds are grouped by RT phylogenetic relatedness (mini-phylograms on the left, with scale bars in nucleotide substitutions per site). Reference scaffold/contig IDs from *A. vaga* and *P. roseola* are shown in red type; *Adineta sp.* contigs (As), in green. Contiguous units from the same family on each scaffold are shown against the yellow background; from other families, against the green background. Blue arrows against the green background denote ORFs from other TE classes; blue arrows with no background, host genes. Other notations are as in Fig. 1.

**Fig. S7.** Properties of coiled-coil (CC) motif-containing ORFs.

(A) Sequence logos of different (gray bar) and similar (blue bar) regions from 67 NWT-like (top) and 46 JVX-like (bottom) ORFs. Light gray arrows mark family-specific intron positions also shown in (B); pink bar, weak homology to HTH motif. (B) Prediction of coiled-coil motifs in NWT-like (top) and JVX-like (bottom) ORFs. The gray and blue bars mark the regions shown in detail in (A). Black arrow, intron position conserved in both CC-ORF types; dark gray arrow, intron conserved in all NWT-like ORFs; light gray arrows, family-specific introns in P and J families. (C) Maximum likelihood (ML) analysis of NWT-like CC-ORF amino acid sequences, including: stand-alone CC<sub>NWT</sub> ORFs located upstream (u) or downstream (d) from the catalytically intact RT; ORF1's from frameshifted W clade RTs; and N-terminal moieties from RTs of the NT clade. ORFs from *P. roseola* cosmids (Pr) are in red; from *A. vaga* scaffolds, in black; and from *Adineta sp.* 11 (As), in green. Asterisks mark a defect in ORF. (D) ML analysis of JVX-like CC-ORFs, including stand-alone CC<sub>JVX</sub> from NT and W clades; ORF1's from the frameshifted VX clade; and N-terminal moieties from the non-frameshifted J clade RT-like amino acid sequences. Scale bars, amino acid substitutions per site.

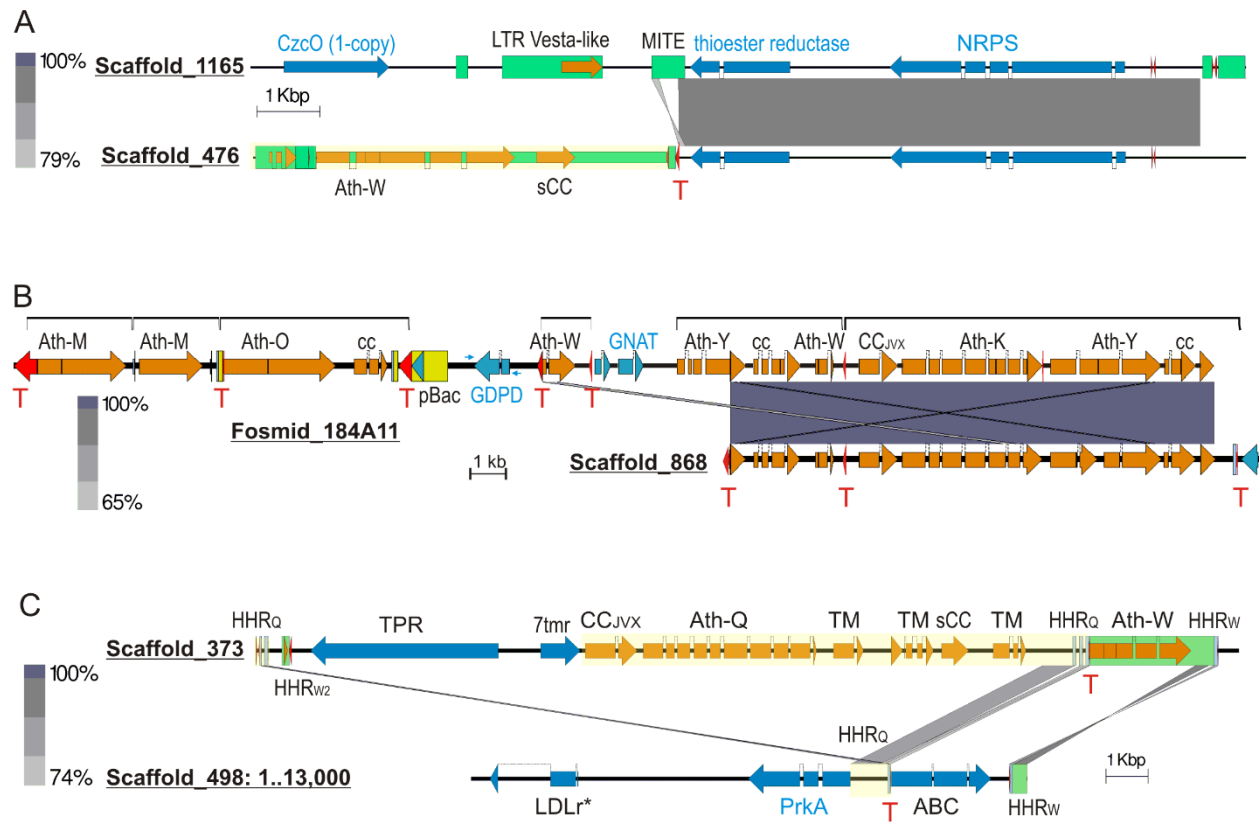

Fig. S1

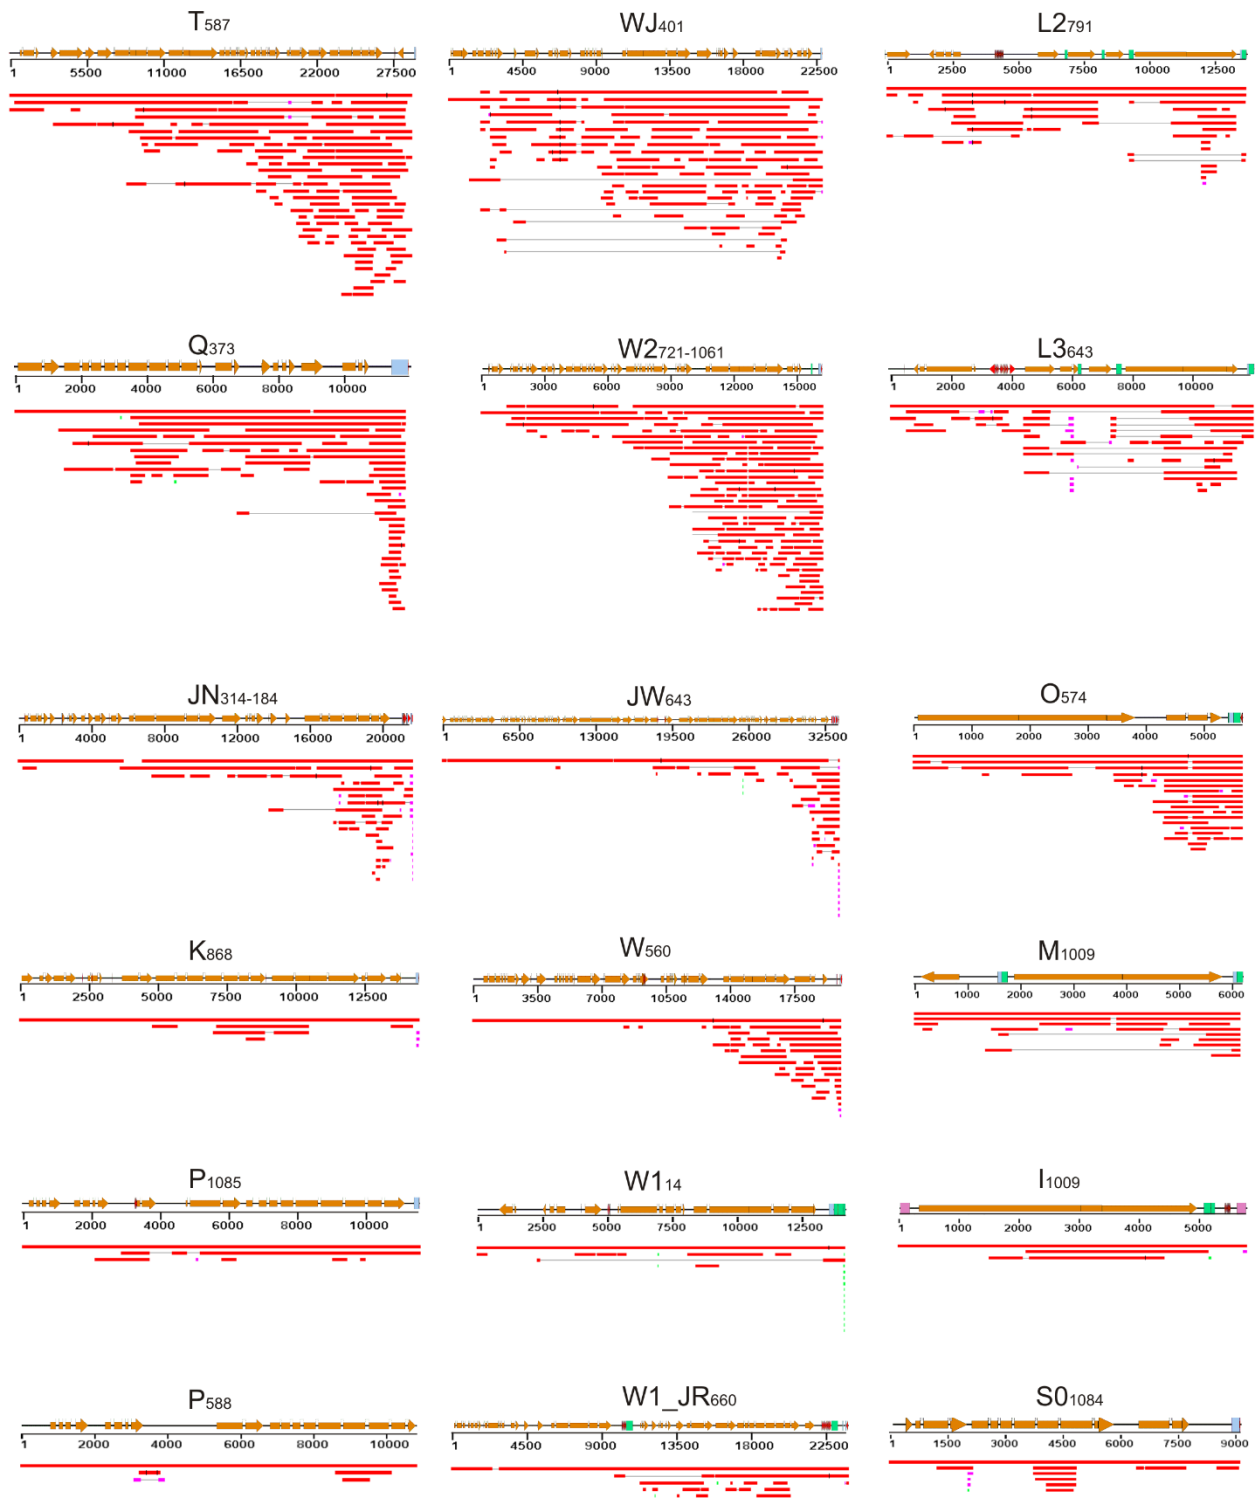

Fig. S2

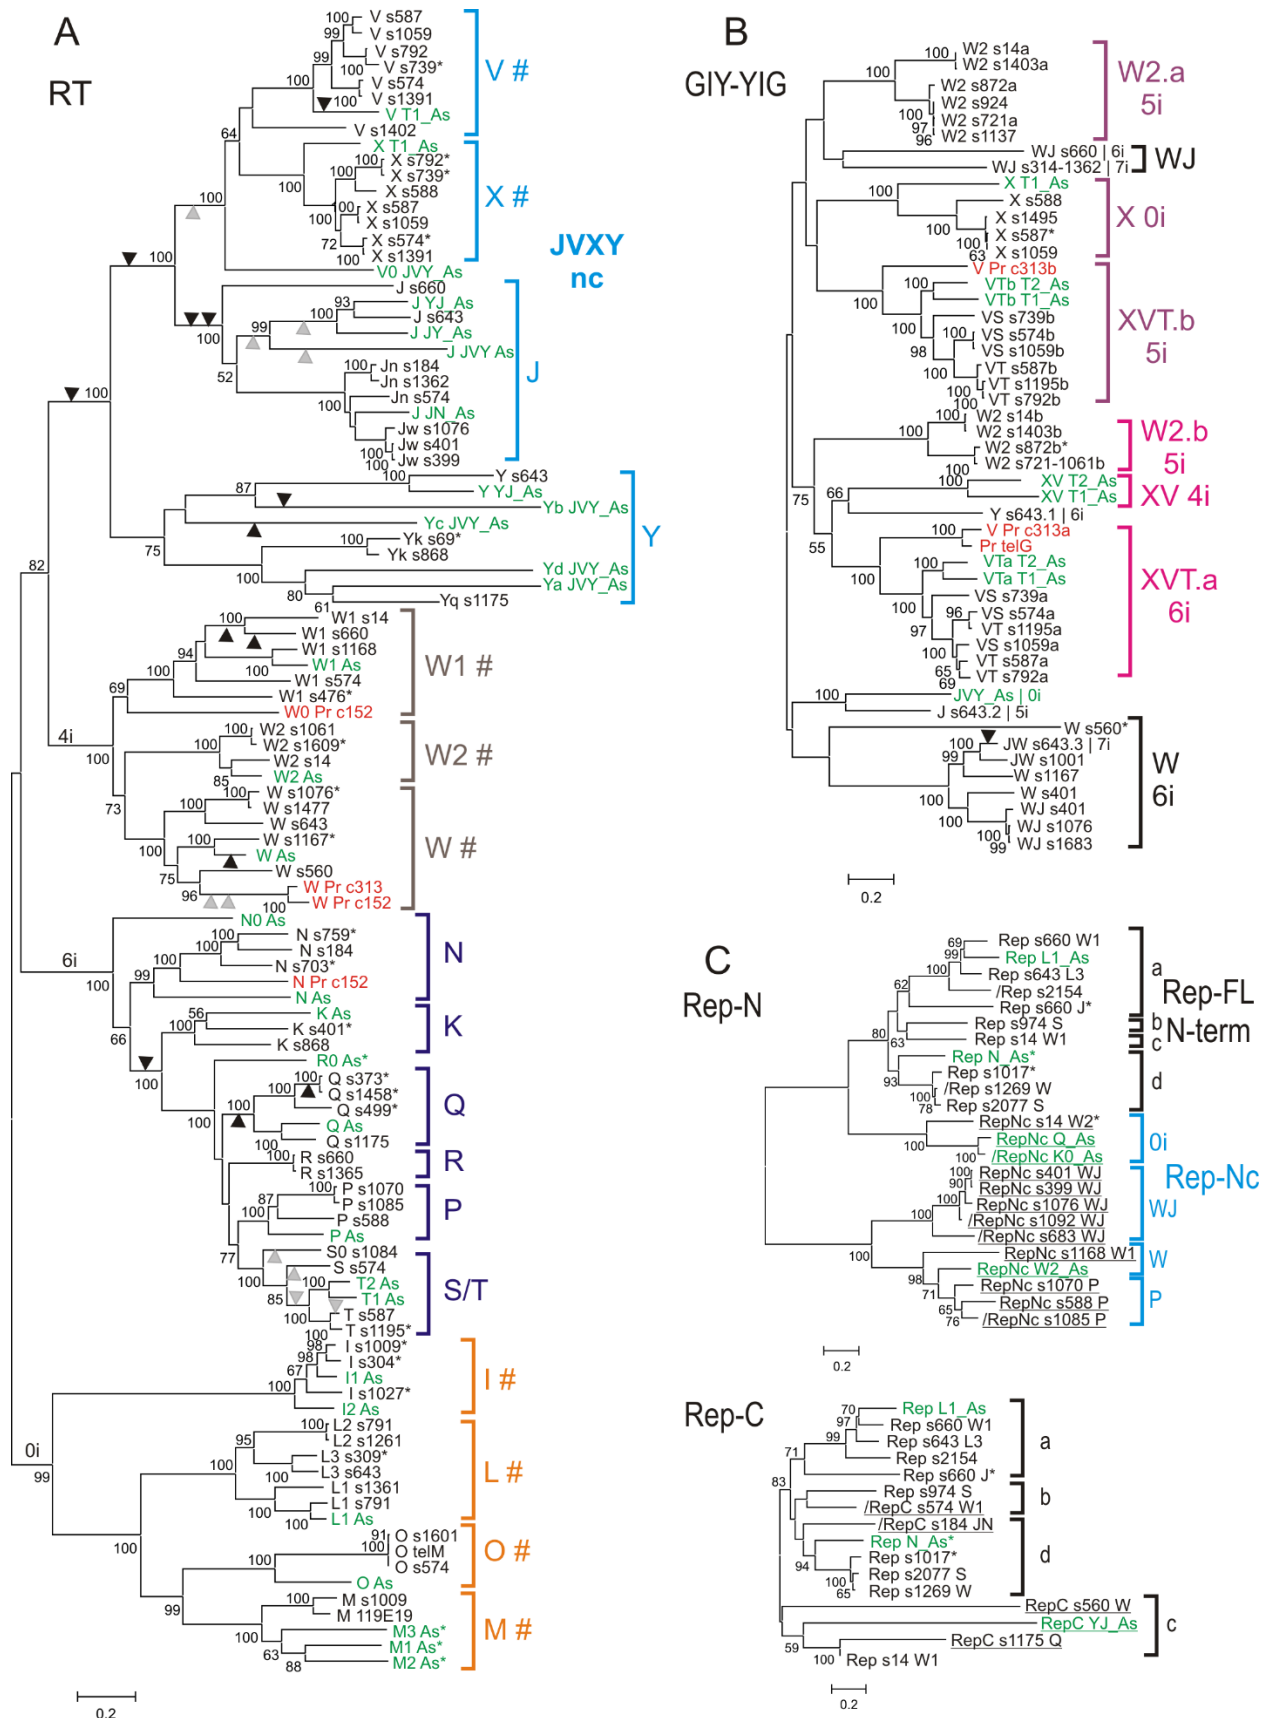

Fig. S3



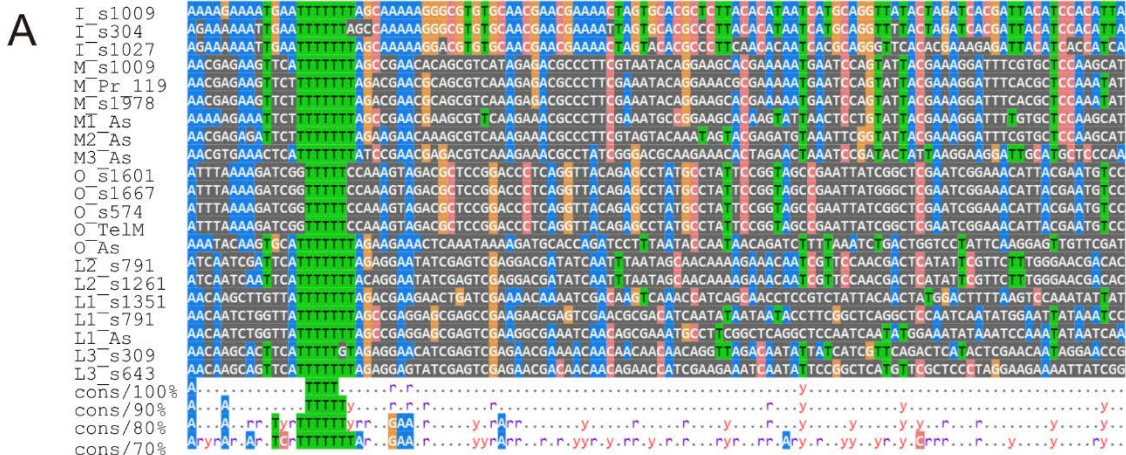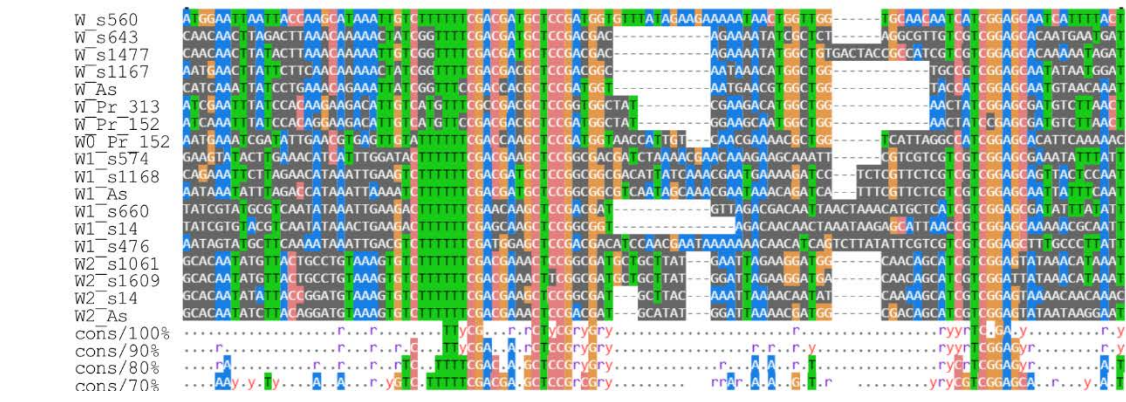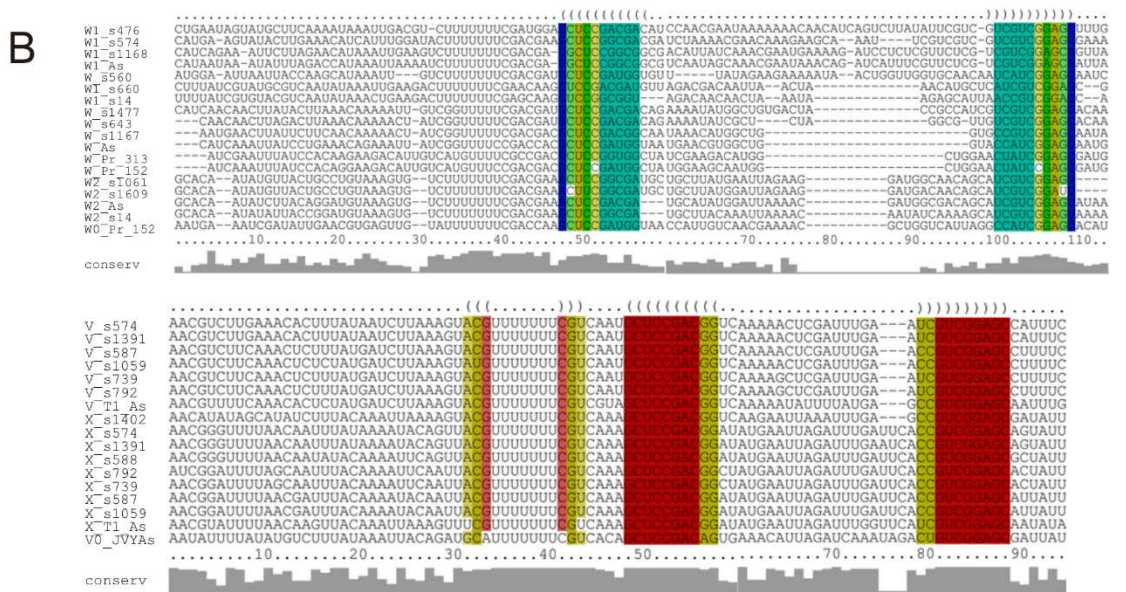

Fig. S4 (A-B)

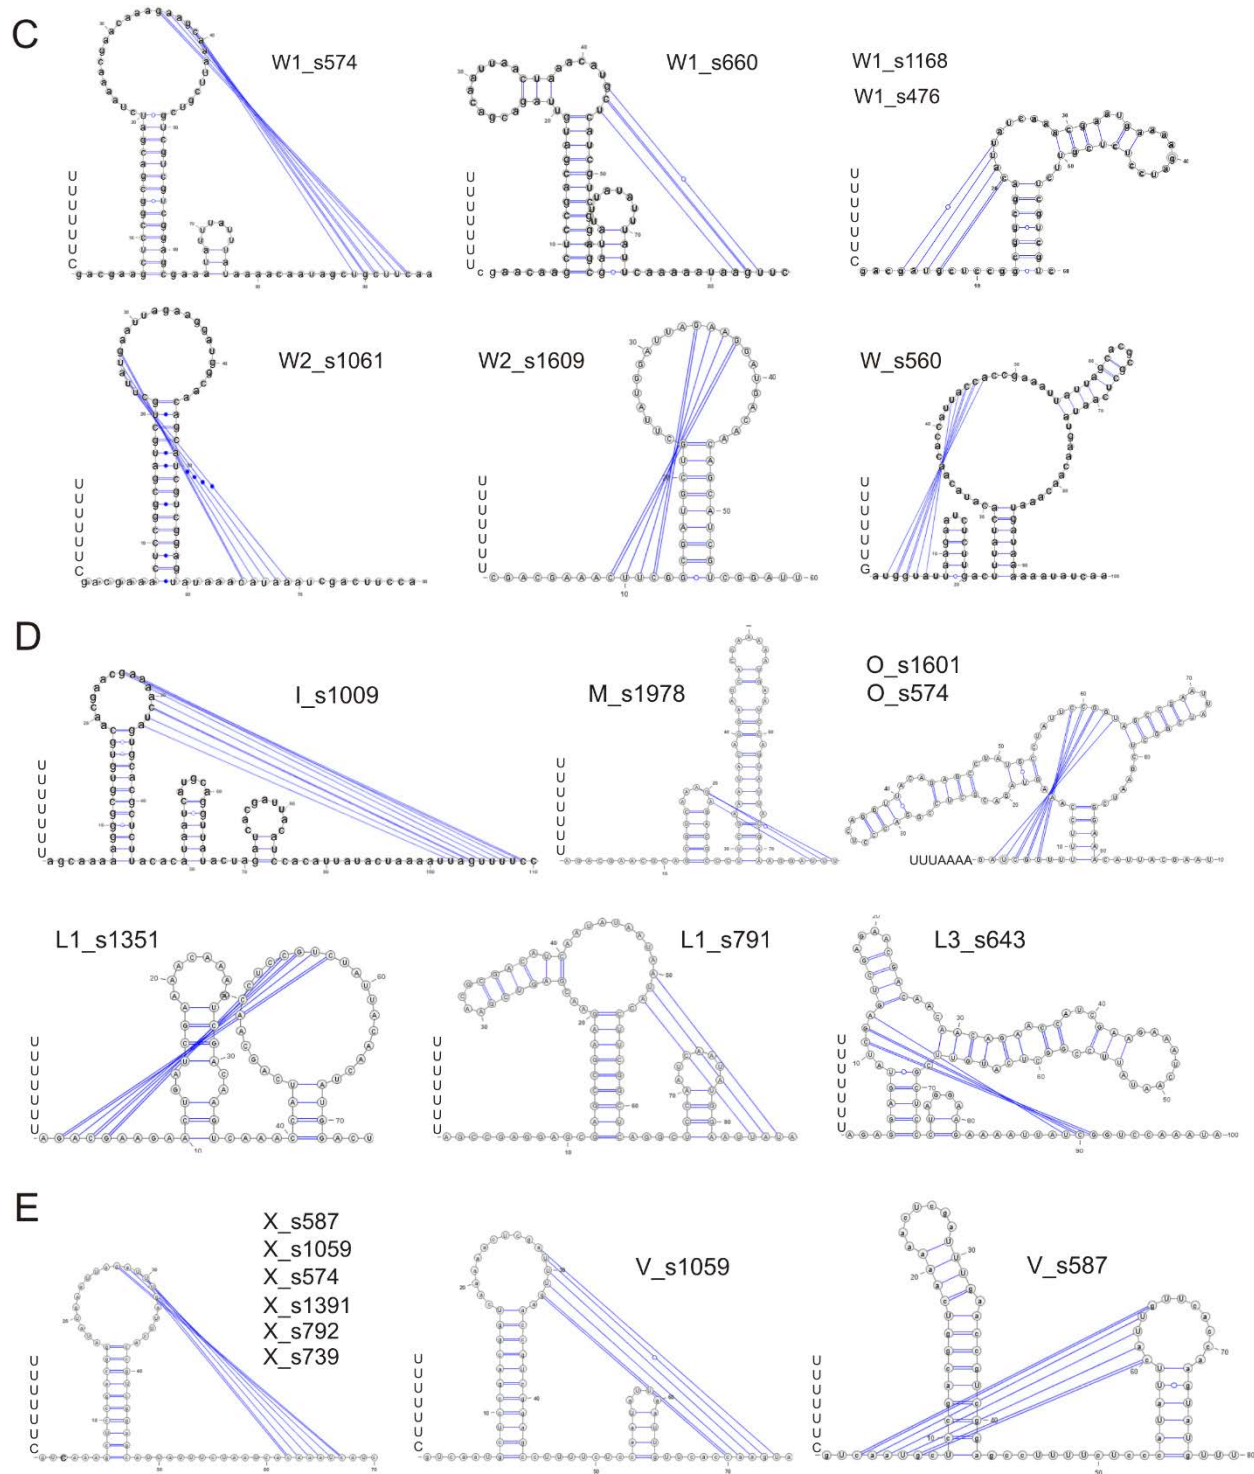

Fig. S4 (C-E)



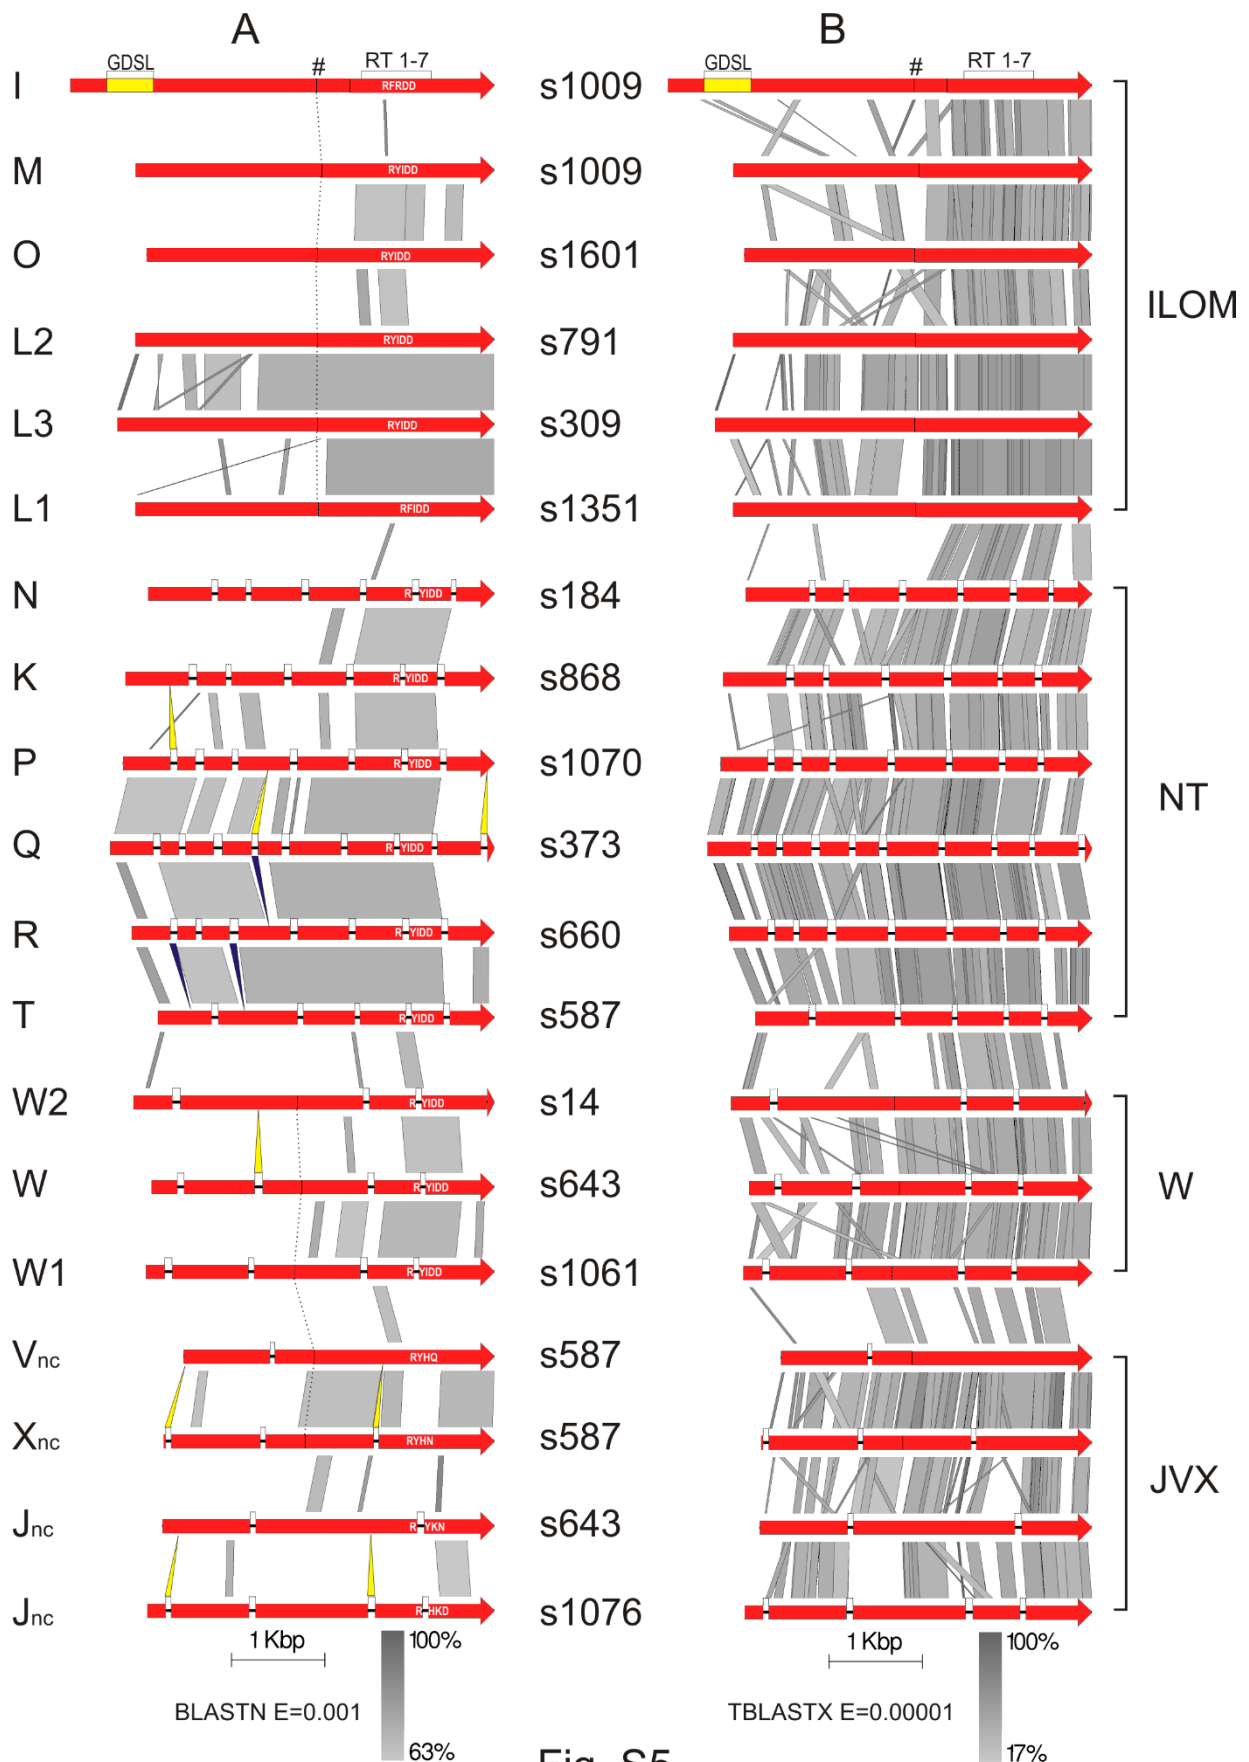

Fig. S5

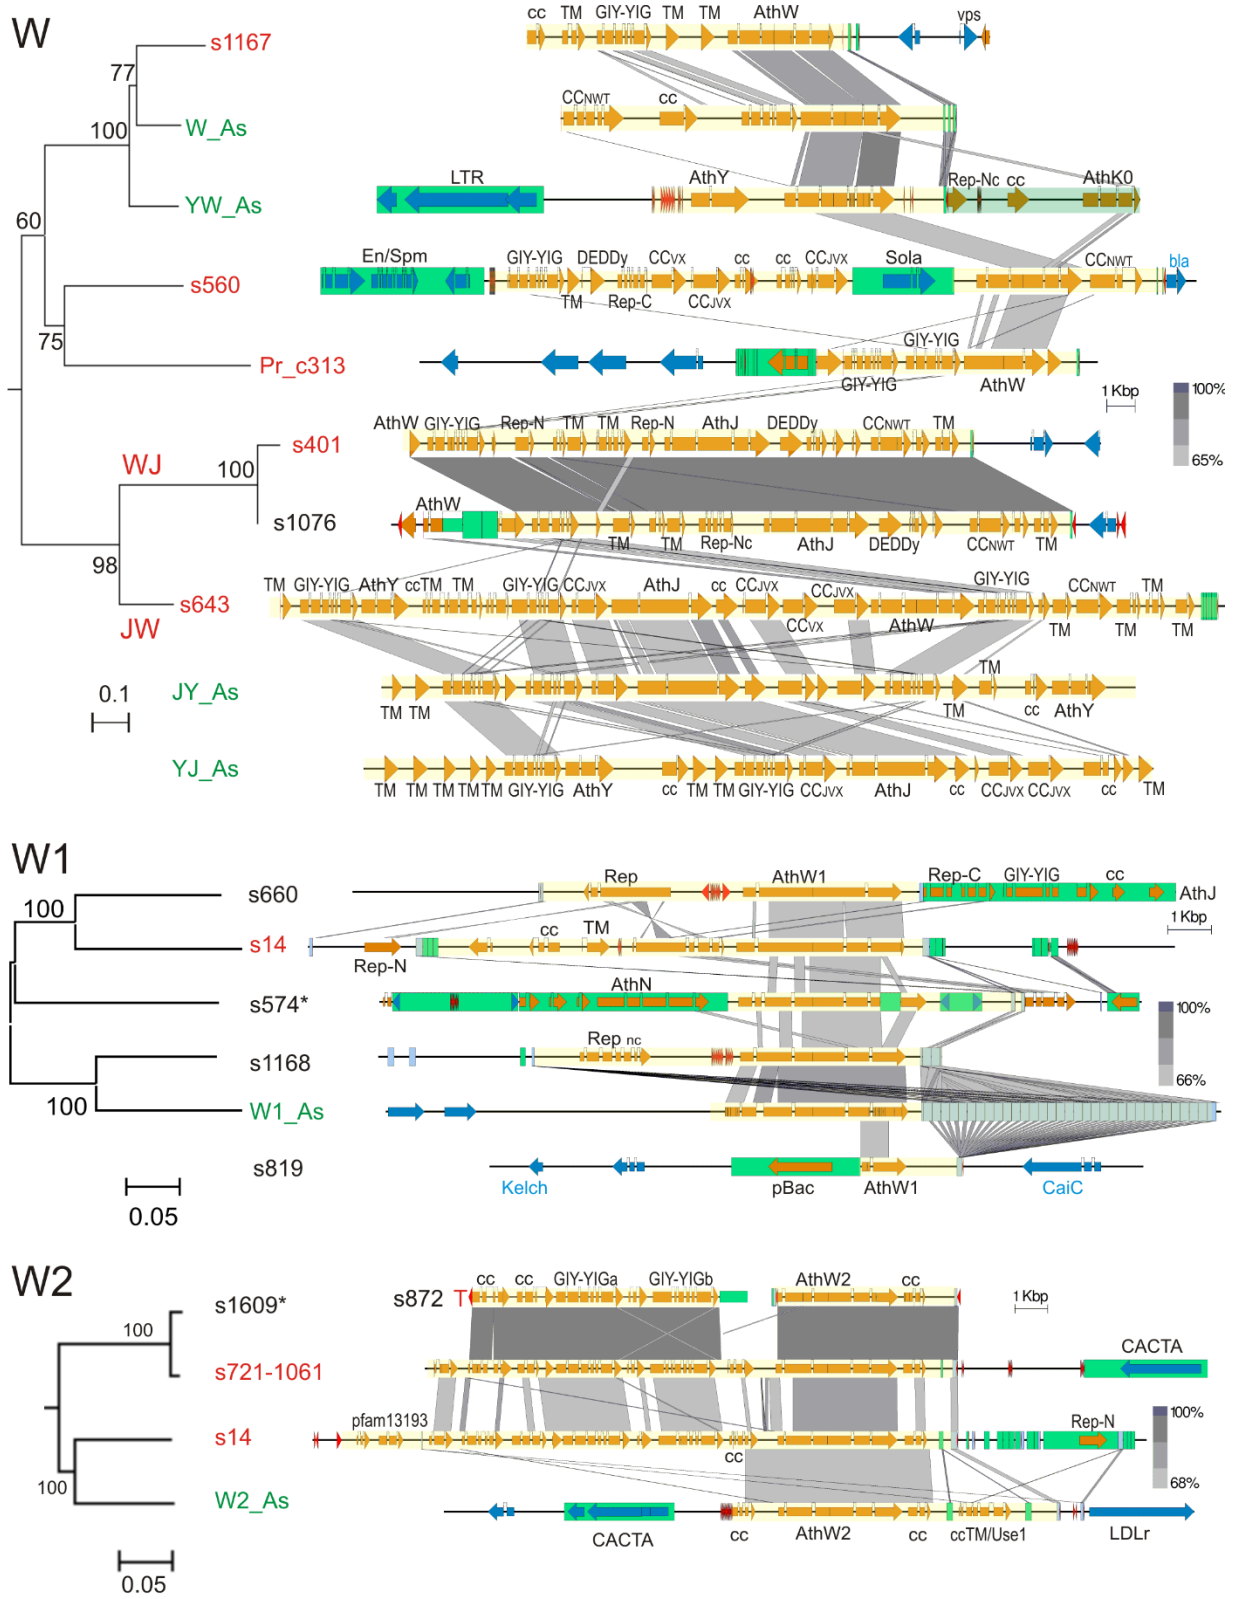

Fig. S6 (A)



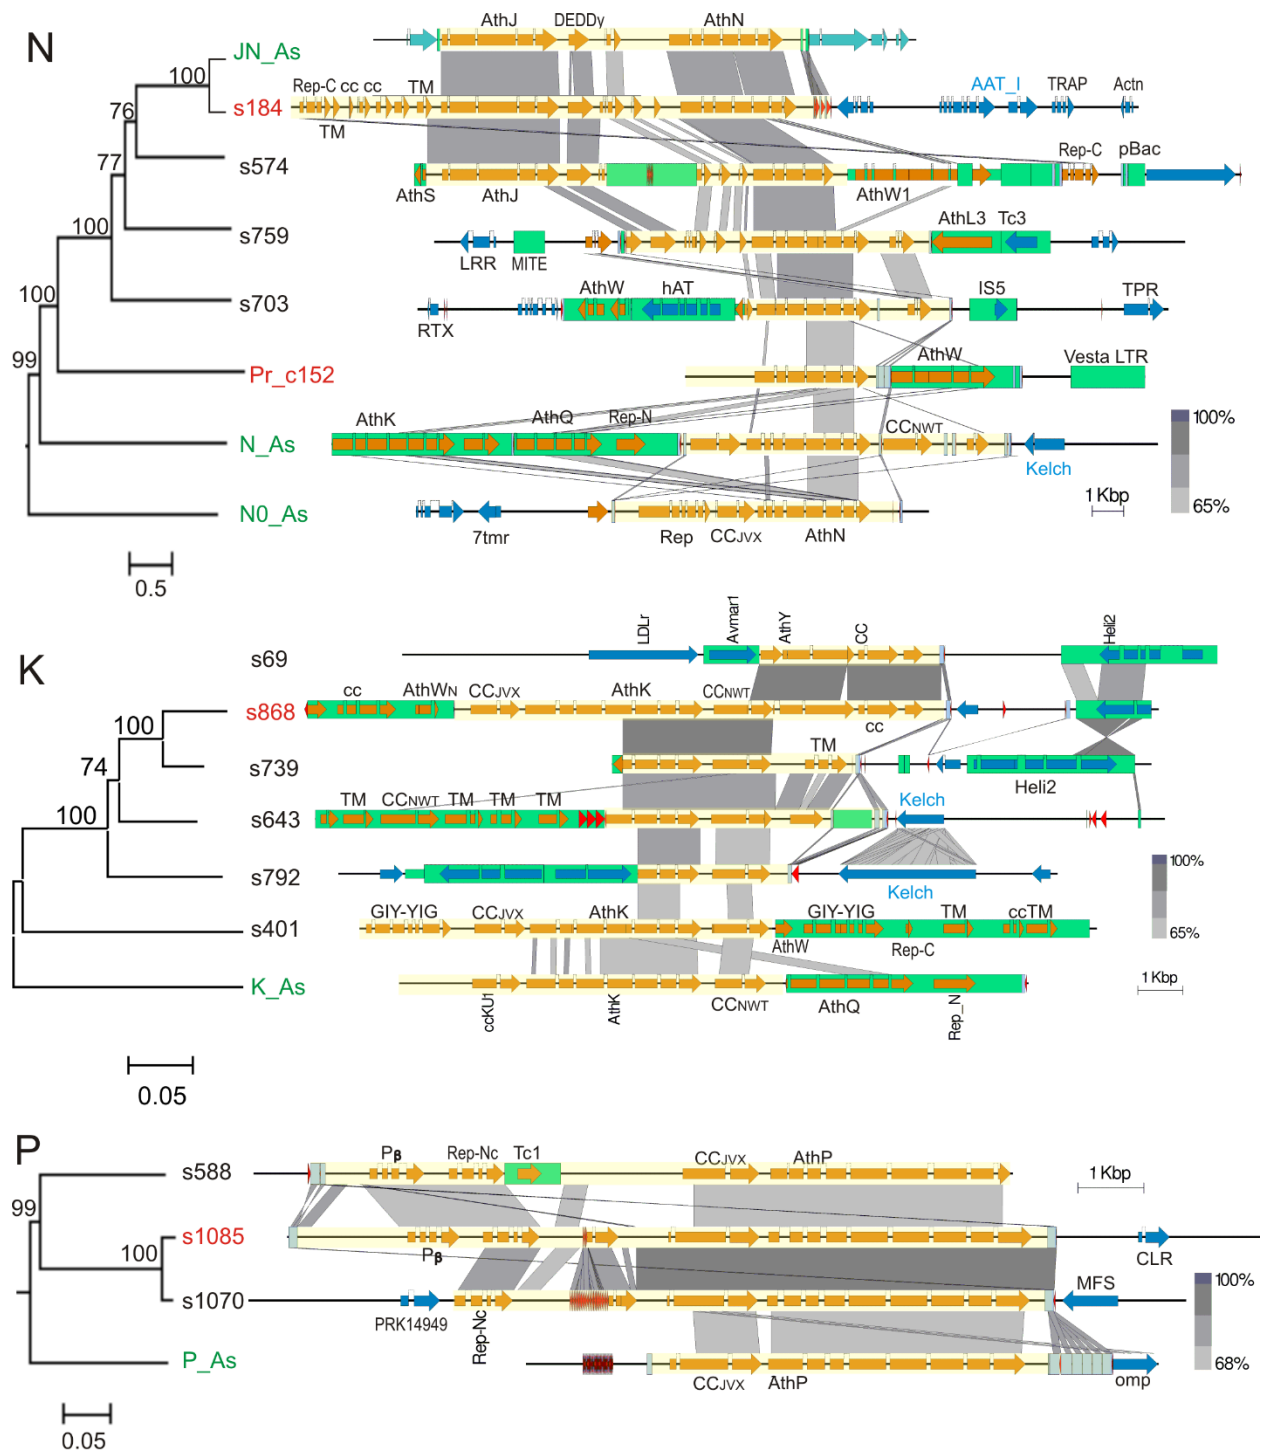

Fig. S6 (B)

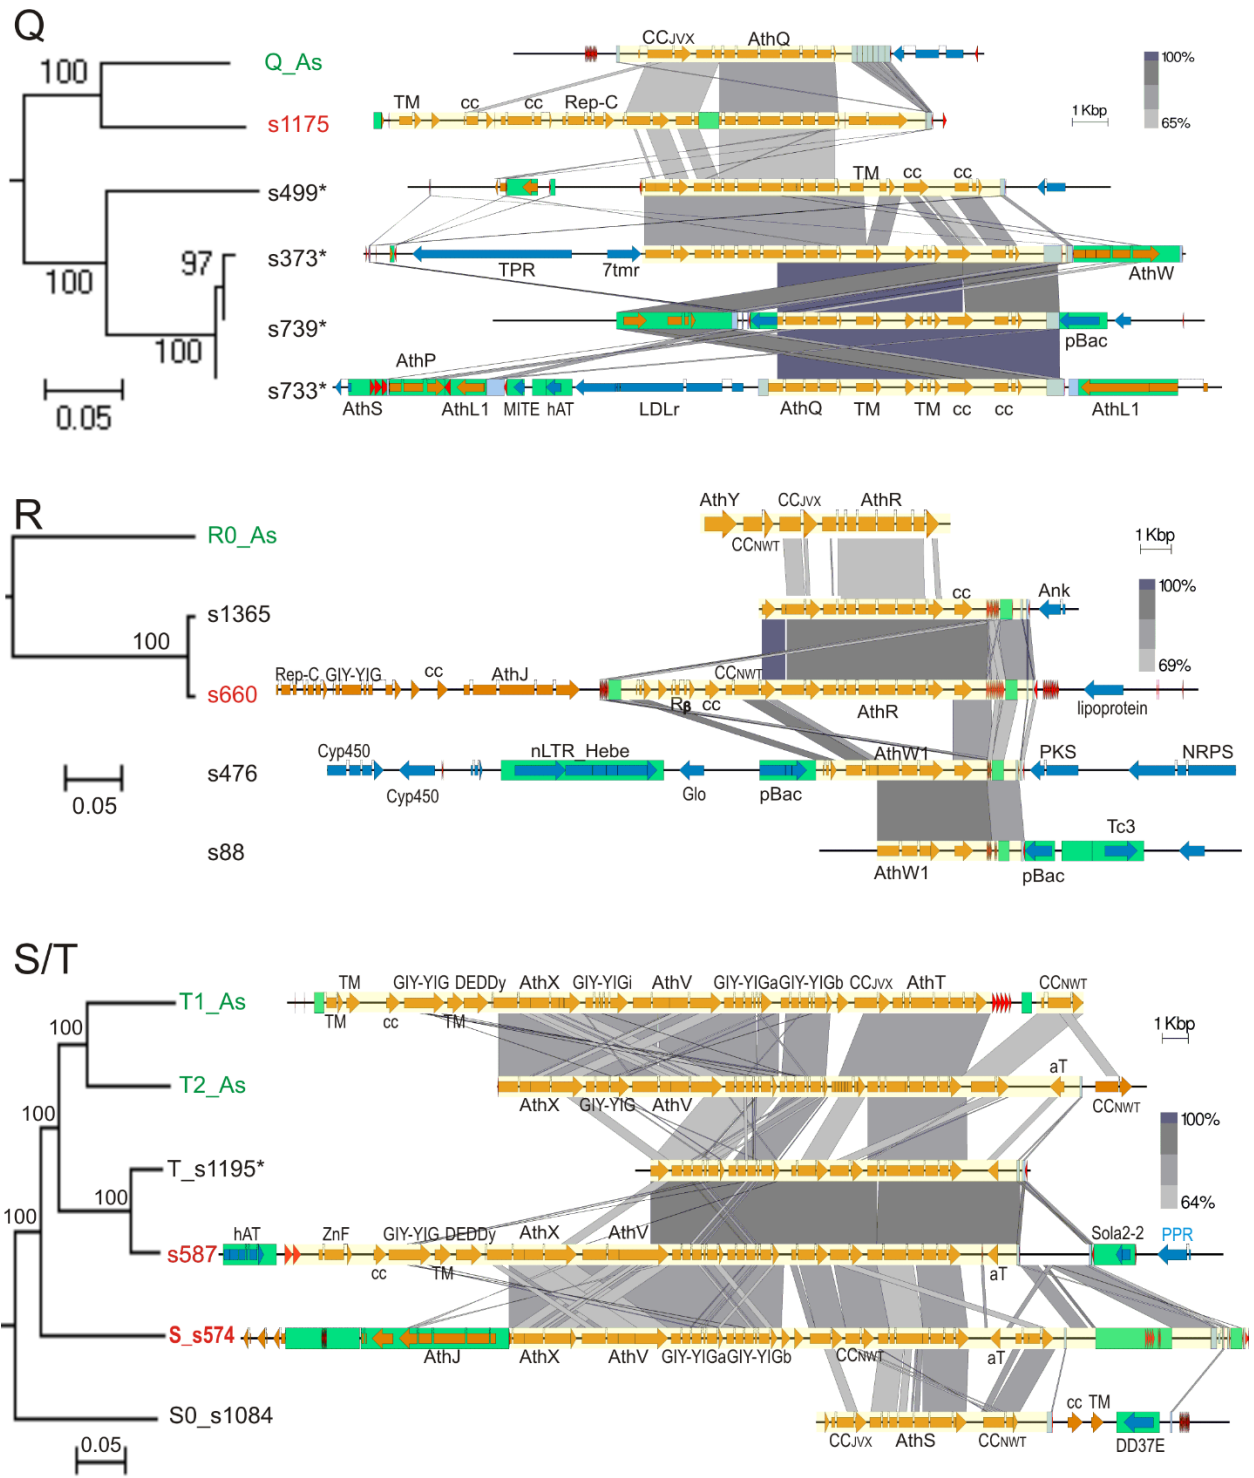

Fig. S6 (C)

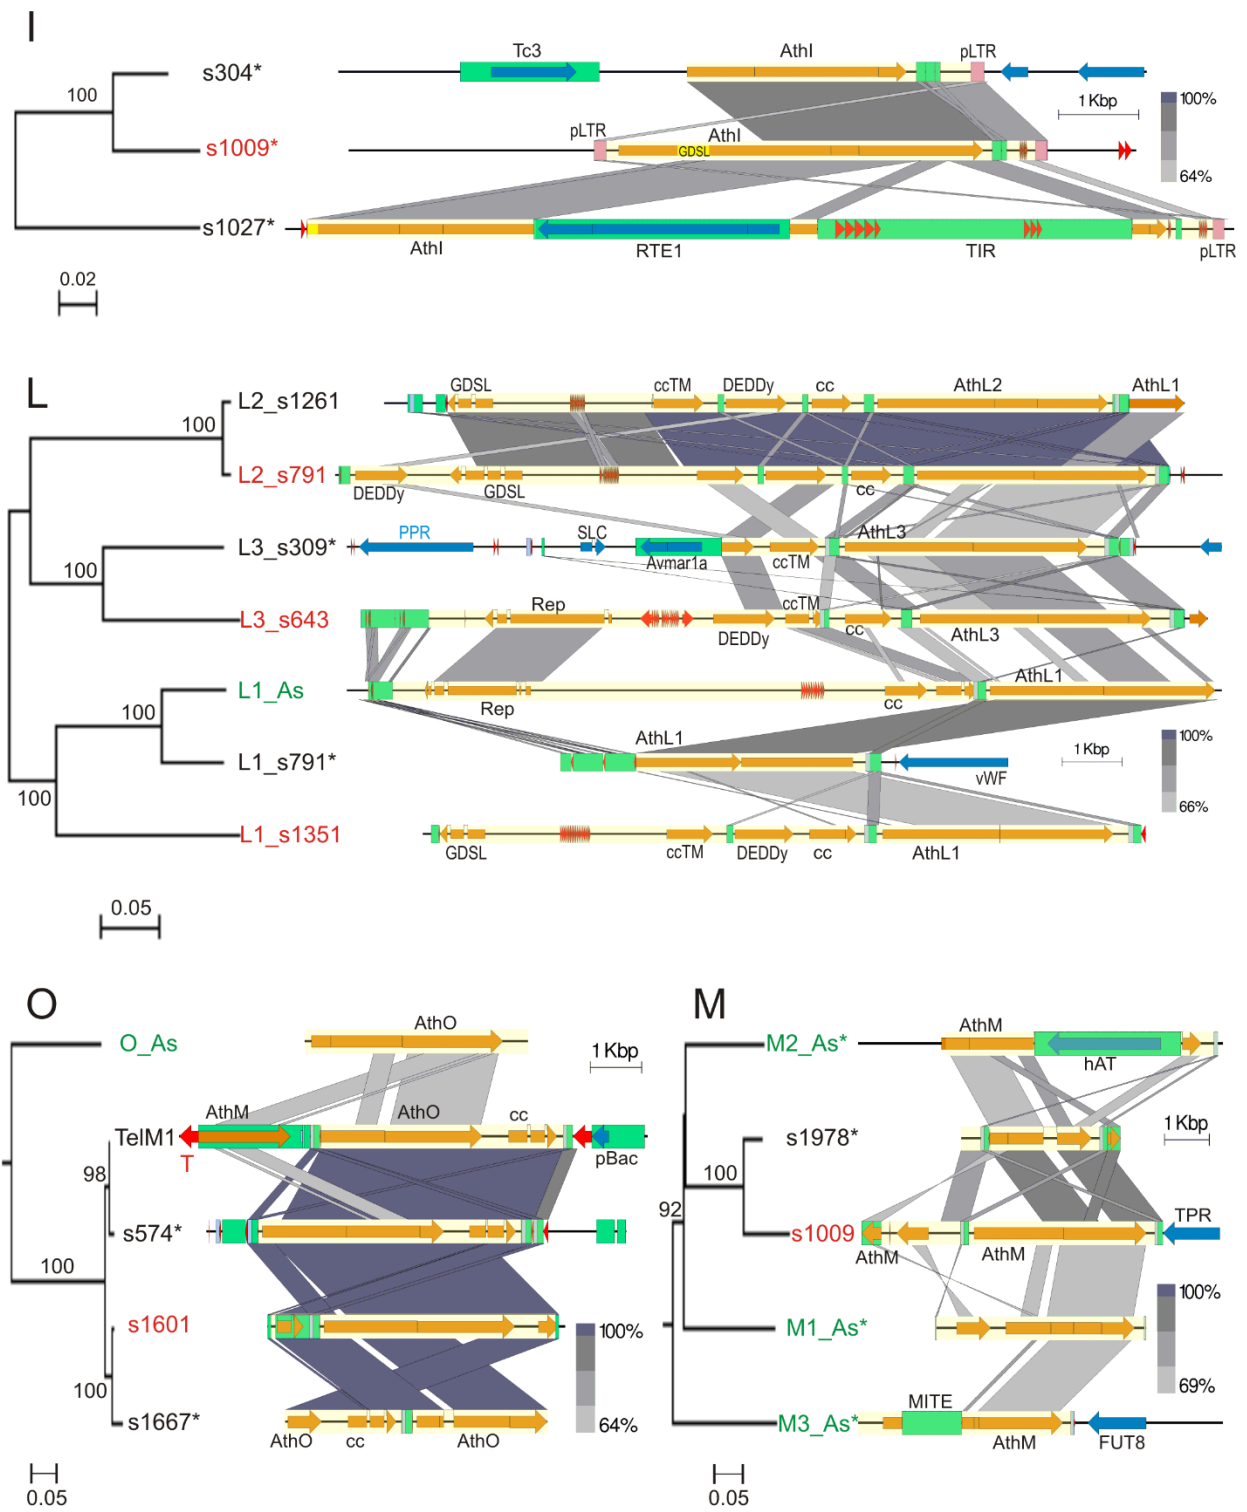

Fig. S6 (D)

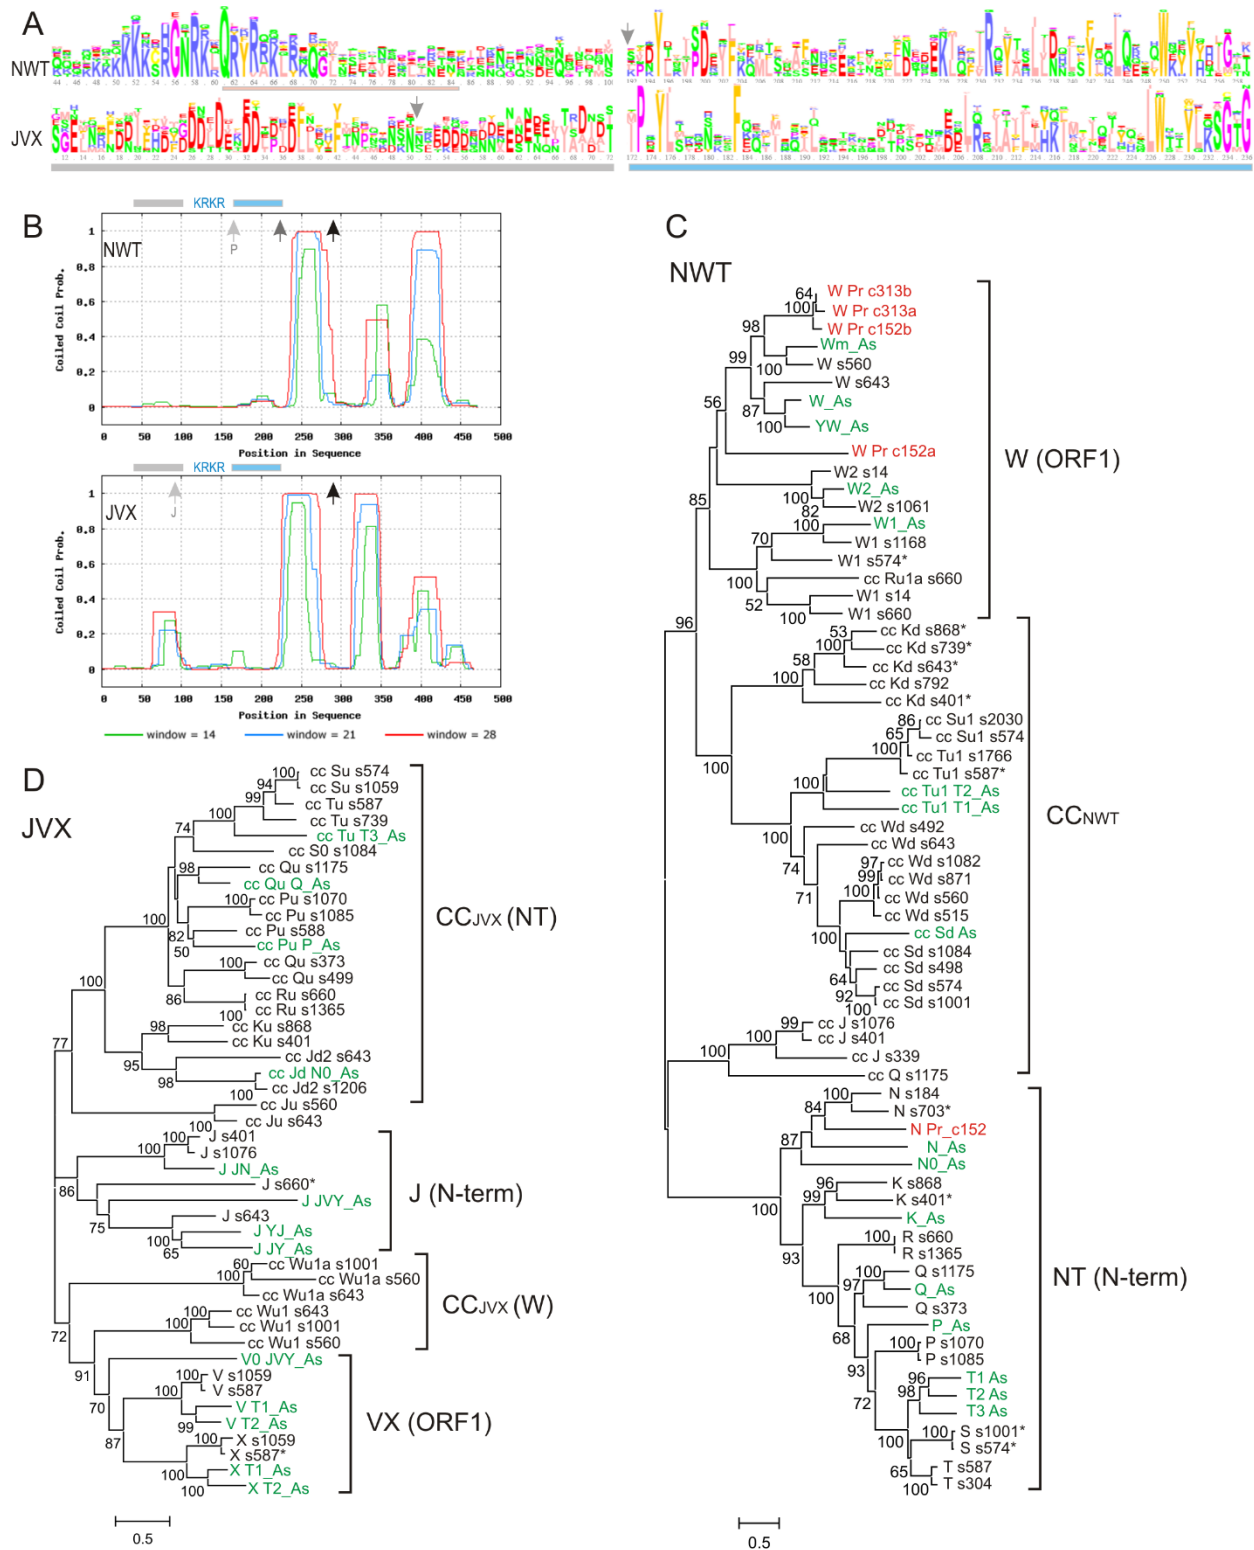

Fig. S7



**Table S1.** Gene content at informative 3'-junctions of *Terminon* elements (within 10 kb of the 3' end). The remaining uninformative 3'-junctions contain little or no adjacent flanking DNA and are not shown. TR, telomeric repeats at 3'-ends. Color coding, genes of foreign origin (blue, bacterial; purple, fungal; green, plant; pink, protist) or TEs (yellow, PLE; orange, DNA TE). Highlighted copies are located on allelic scaffolds. +/-, sense or antisense CDS orientation; /, truncation.

| Copy | Scaffold | TR  | 3'-CDS            | +/- | Copy | Scaffold | TR | 3'-CDS          | +/- |
|------|----------|-----|-------------------|-----|------|----------|----|-----------------|-----|
| JW   | 643      | ✓   | /Athena-K         | -   | W    | 373      | ✓  | TPR             | -   |
| JW   | 309      | ✓   | /TPR              | +   | W    | 373      | ✓  | SET             | -   |
| JW   | 693      | ✓   | NAD-ADPRT/        | -   | W    | 1354     | ✓  | NRPS            | -   |
| JW   | 574      | ✓   | UDP-GTase         | +   | W    | 922      | ✓  | /LDL receptor   | -   |
| WJ   | 664      | ✓   | lectin            | +   | W    | 560      | ✓  | /β-lactamase    | +   |
| WJ   | 399      | ✓   | Kelch             | -   | W    | 476      | ✓  | NRPS            | -   |
| WJ   | 1070     | ✓   | TPR               | -   | W    | 1082     | ✓  | RfbB epimerase  | -   |
| WJ   | 1571     | ✓   | NRPS              | -   | W    | 664      | ✓  | ABC transporter | -   |
| WJ   | 1292     | ✓   | TPR               | -   | W2   | 1041     | ✓  | LRR             | -   |
| WJ   | 1203     | ✓   | ankyrin           | -   | W1   | 88       | ✓  | Pokey4 TPase/   | -   |
| WJ   | 1386     | ✓   | hypothetical Av   | +   | W2   | 536      | ✓  | GTase           | -   |
| WJ   | 1058     | ✓   | GTase             | -   | W2   | 339      | ✓  | vcbs/SxtP       | -   |
| WJ   | 3004     | ✓   | AIG1              | -   | W2   | 552      | ✓  | zf-C2H2/        | -   |
| WJ   | 860      | ✓   | MTase             | +   | W2   | 214      | ✓  | Ig-like         | -   |
| WJ   | 648      | ✓   | GTPase            | -   | W2   | 274      | ✓  | Ig-like         | -   |
| JN   | 184      | ✓   | lectin            | -   | S    | 852      | ✓  | NRPS            | +   |
| N    | 695      | ✓   | NRPS              | -   | S    | 1254     | ✓  | NRPS            | +   |
| N    | 703      | ✓   | IS5               | -   | S    | 1001     | ✓  | /Athena-W       | +   |
| N    | 759      | ✓   | Athena-M/         | -   | S    | 498      | -  | vcbs            | -   |
| N,W  | 736      | ✓   | GTase             | -   | S    | 974      | ✓  | LDL receptor    | -   |
| K    | 868      | ✓   | hypothetical      | -   | T    | 1084     | ✓  | hypothetical    | -   |
| K    | 643      | ✓   | Kelch/            | -   | T    | 792      | ✓  | PAT1            | -   |
| K    | 792      | ✓   | Kelch             | -   | T    | 209      | ✓  | ABC ATPase      | -   |
| P    | 1070     | ✓   | folate transport  | -   | T    | 404      | ✓  | /Athena-K       | -   |
| P    | 1085     | ✓   | lectin receptor   | +   | T    | 979      | ✓  | acyltransferase | -   |
| Q    | 739      | ✓   | Looper TPase/     | -   | T    | 587      | ✓  | Sola2-2         | -   |
| Q    | 88       | ✓   | Merlin TPase      | -   | T    | 809      | ✓  | vcbs            | -   |
| Q    | 339      | ✓   | hypothetical      | -   | T    | 41       | -  | /filamin        | +   |
| Q    | 156      | ✓   | Merlin TPase      | -   | T    | 1041     | ✓  | F-box/LRR       | -   |
| R    | 660      | ✓   | lipoprotein       | -   | T    | 304      | ✓  | Penelope2       | -   |
| R    | 1365     | ✓   | ankyrin           | -   | T    | 974      | ✓  | LDL receptor    | -   |
| L1   | 560      | ✓   | /Helitron         | +   | T    | 1457     | ✓  | Athena-L        | +   |
| L1   | 791      | -   | cell surface prot | -   | T    | 612      | ✓  | FkbM MTase      | +   |
| L1   | 733      | +/- | Athena-Q          | -   | T    | 1027     | ✓  | NHL             | +   |
| L1   | 404      | -   | Avmar TPase       | +   | T    | 798      | ✓  | nitroreductase  | -   |
| L2   | 866      | ✓   | peptidase         | -   | M    | 1009     | -  | TPR/            | -   |
| L2   | 24       | ✓   | /NHL              | +   | M    | 1224     | -  | MuDR TPase      | -   |
| L2   | 1015     | -   | hypothetical Av   | +   | M    | 1036     | -  | TLR-2           | -   |
| L2   | 1193     | -   | NRPS              | -   | M    | 809      | -  | ISL2EU TPase    | +   |
| L2   | 476      | ✓   | 7tm receptor      | +   | M    | 13       | -  | NAD-ADPRT       | +   |
| L2   | 1261     | -   | /Athena-L         | +   | M    | 1978     | ✓  | Athena-M        | +   |
| L3   | 309      | ✓   | hypothetical Av   | -   | O    | 574      | ✓  | hAT TPase       | +   |
| L3   | 1045     | ✓   | Sola2d            |     | O    | 399      | ✓  | Athena-J        | +   |
| L3   | 643      | ✓   | Athena-JW         |     | O    | 404      | ✓  | Tcb1 TPase      | +   |
| L3   | 664      | ✓   | peptidase         |     | O    | 703      | ✓  | Athena-L        | +   |

**Table S2.** Differences in telomeric repeat distribution around different TE types.

| Window size               | 2Kb     |            | 5Kb     |             | 10Kb    |            |
|---------------------------|---------|------------|---------|-------------|---------|------------|
|                           | t value | p value    | t value | p value     | t value | p value    |
| ANOVA Tukey's comparisons |         |            |         |             |         |            |
| LTR – Helitron            | -1.357  | 0.731      | -1.042  | 0.89209     | -1.687  | 0.5125     |
| non-LTR – Helitron        | -1.268  | 0.783      | -1.588  | 0.57897     | -1.135  | 0.8523     |
| Athena – Helitron         | 4.01    | <0.001 *** | 5.88    | < 0.001 *** | 5.678   | <0.001 *** |
| Penelope – Helitron       | 1.244   | 0.796      | -0.021  | 1           | 0.163   | 1          |
| TIR – Helitron            | -0.679  | 0.982      | -0.298  | 0.99964     | 0.925   | 0.9326     |
| non-LTR – LTR             | 0.12    | 1          | -0.453  | 0.99723     | 0.541   | 0.9936     |
| Athena – LTR              | 4.804   | <0.001 *** | 6.173   | < 0.001 *** | 6.587   | <0.001 *** |
| Penelope – LTR            | 2       | 0.317      | 0.605   | 0.98929     | 1.167   | 0.8368     |
| TIR – LTR                 | 1.076   | 0.879      | 1.006   | 0.90585     | 2.753   | 0.0582 .   |
| Athena – non-LTR          | 4.819   | <0.001 *** | 6.819   | < 0.001 *** | 6.219   | <0.001 *** |
| Penelope – non-LTR        | 1.945   | 0.349      | 0.912   | 0.93636     | 0.823   | 0.9584     |
| TIR – non-LTR             | 0.966   | 0.92       | 1.675   | 0.52085     | 2.152   | 0.2394     |
| Penelope – Athena         | -1.144  | 0.848      | -3.462  | 0.00619 **  | -3.166  | 0.0170 *   |
| TIR – Athena              | -5.442  | <0.001 *** | -7.391  | < 0.001 *** | -6.111  | <0.001 *** |
| TIR – Penelope            | -1.63   | 0.551      | -0.111  | 1           | 0.242   | 0.9999     |

A one-way ANOVA followed by Tukey's post hoc test was used to test for differences in the mean counts of telomeric repeats between different TE types (Helitron, LTR, non-LTR, Athena, Penelope and TIR) in three window sizes. TE type was found to have an impact on the number of nearby telomeric repeats: 2 Kb window,  $F(5, 15847) = 7.366$ ,  $***P < 0.001$ ; 5 Kb window,  $F(5, 15847) = 12.788$ ,  $***P < 0.001$ ; and 10 Kb window,  $F(5, 15847) = 11.461$ ,  $***P < 0.001$ . Post-hoc Tukey's test showed that Athena RTs have significantly higher counts of nearby telomeric repeats than LTR, non-LTR, TIR and Helitron elements, while differences with Penelope elements start at the 5 Kb window. Significance codes: 0 '\*\*\*' 0.001 '\*\*' 0.01 '\*' 0.05 '.' 0.1 '.' 1. Adjusted p values are reported.

## **Supplementary Methods**

**Genome and transcriptome datasets.** We used the *Adineta vaga* reference genome (Flot, et al. 2013) available in GenBank as unannotated scaffolds (CAWI000000000.2), for homology searches, and in the browser format at [www.genoscope.cns.fr/adineta/cgi-bin/gbrowse/adineta](http://www.genoscope.cns.fr/adineta/cgi-bin/gbrowse/adineta) to download the annotated scaffolds containing matches to *Athena* RTs (Gladyshev and Arkhipova 2007). Matching scaffolds were individually reannotated using GeneWise ([www.ebi.ac.uk/Tools/psa/genewise/](http://www.ebi.ac.uk/Tools/psa/genewise/)) and manually adjusted to introduce corrections into *Athena* RTs and associated ORF sequences, which were mostly misannotated due to the poor approximation of the *C. elegans*-trained gene models to TE-encoded ORFs. For the same reason, this procedure was also applied to genes of non-metazoan origin. The Sanger-sequenced *A. vaga* and *P. roseola* large-insert library clones were from Av\_184A11, Av\_119E19, Pr\_152C9, Pr\_313N6, PrTEL\_IV\_4, Pr\_TEL\_G (EU643486, EF485018, DQ138288, MF143428, EF485015, EF485006). The PacBio draft partial assembly was obtained from 15 SMRT cells using the HGAP assembler in the SMRT® Portal (Pacific Biosciences). TE consensus sequences reported in this study have been submitted to Repbase (Bao, et al. 2015). The *A. vaga* transcripts were uniquely mapped to the reference genome using Bowtie2 (Langmead and Salzberg 2012) on 75-nt Illumina GAIIx reads for cDNA (ERX234948), and using Bowtie (Langmead, et al. 2009) on 50-nt Illumina HiSeq small RNA reads (SRP070765). Aligned sequence reads were counted by annotated genomic feature with htseq-count (Anders, et al. 2015).

**Bioinformatics.** Programmed ribosomal frameshifting sites with simple pseudoknots were identified using KnotInFrame (Janssen and Giegerich 2015) and graphically represented using VARNA (Darty, et al. 2009). Secondary-structure-based multiple RNA alignments were performed with LocARNA (Smith, et al. 2010). Domain architecture was assessed with CDART (Geer, et al. 2002). Graphical representation of pairwise BLASTN and TBLASTX similarities between genomic scaffolds was done with Easyfig 2.2.2 (Sullivan, et al. 2011), and graphical overviews of genome-wide BLASTN searches of *A. vaga* scaffolds were obtained from NCBI server (<https://blast.ncbi.nlm.nih.gov/Blast.cgi>) with the megablast option. Multiple sequence alignments were done using MUSCLE (Edgar 2004); for protein-coding sequences, alignments were codon-based. Sequence logos for multiple alignments with AlignmentViewer, prediction of coiled-coil motifs with COILS/PCOILS, and profile-profile homology searches with HHPRED were done using the MPI toolkit (Alva, et al. 2016). HHR motif alignment was created with Boxshade 3.3.1. Maximum likelihood phylogenetic analysis was done using the GTR+F+G model for nucleotide sequences and the WAG+F+G model for amino acid sequences, with a discrete gamma distribution used to model evolutionary rate differences across sites (G=5), and the resulting trees were edited in MEGA 7.0.18 (Kumar, et al. 2016). To identify HHR motifs characteristic of the L and WJ families, we used RNAMotif 3.1.1 (Macke, et al. 2001) with the descriptor from (Cervera and De la Pena 2014) relaxed to accommodate core-I: ss (minlen=7, maxlen=9); longer loop 2: ss (minlen=3, maxlen=16); and split core-II: ss (minlen=3, maxlen=6, seq="gaa\$"), ss (minlen=3, maxlen=10, seq="nuh\$"). Telomeric repeats in *A. vaga* were annotated using the sequence (TGWGGG)<sub>n</sub> and counted in different window sizes around the annotated genomic features of interest. The *A. vaga* gene set was divided into non-metazoan (foreign) and metazoan subsets, with the latter additionally subdivided to genes with and without piRNA coverage, as described in (Rodriguez and Arkhipova 2016). Statistical significance of the frequency of association between telomeric repeats and different TE types was estimated using single-factor ANOVA (Tukey's test). Significant values were assumed at  $p < 0.05$ .

**Nucleic acid manipulations.** Genomic DNA from rotifer eggs purified as in (Flot, et al. 2013) and ground in liquid N<sub>2</sub> was extracted with the Qiagen Genomic-Tip 500/G tissue protocol according to manufacturer's instructions with minor modifications, and checked for integrity by pulsed-field gel electrophoresis. After BluePippin size selection, it was used to construct a 20-kb library, which was sequenced on PacBio RS II at the Johns Hopkins University Deep Sequencing and Microarray Core with P6-C4 chemistry. The 462-bp JW-643 fragment with three identical tandem HHR-containing units from scaffold\_643:36798..37259 was chemically synthesized by GenScript and cloned into the KpnI-BamHI sites of pBluescript II SK+. The plasmid template was linearized with BamHI and used for *in vitro* transcription. The reaction mix containing 40 mM Tris-HCl, pH 8.0, 6 mM MgCl<sub>2</sub>, 2 mM spermidine, 0.5 mg/ml RNase-free BSA, 0.1% Triton X-100, 10 mM dithiothreitol, 1 mM ATP, 1 mM CTP, 1 mM GTP, 0.1 mM UTP, 0.5 μCi/μl [ $\alpha$ -<sup>32</sup>P]-UTP (Perkin-Elmer), 20 U RNase inhibitor (Roche), 20 μg/ml DNA, and 4 U/μl T7 RNA polymerase (Stratagene) was incubated at 37°C for 8.5 hrs. Labeled full-length transcripts were extracted from polyacrylamide gels and purified using RNA Clean & Concentrator™-5 kit (Zymo Research). Purified *in*

*in vitro* transcripts were used to set up self-cleavage reactions in 50 mM Tris-HCl, pH 7.5, 20 U RNase inhibitor (Roche), heated at 95°C for 1 min, and pre-incubated at 25°C for 15 min. Self-cleavage was initiated by addition of MgCl<sub>2</sub> or MnCl<sub>2</sub>, aliquots were taken at different time points, immediately placed on ice, mixed with the stop solution (8 M urea, 50% formamide, 50 mM EDTA, 0.1% xylene cyanol, 0.1% bromophenol blue), and run on 15% urea PAGE. Self-cleavage assays for *AvPen3a* HHR were essentially similar, except that the plasmid template was obtained by cloning of a 310-bp PCR-generated *AvPen3a* (scaffold 1009) using primers F (CGGGGTACCTGCAGTAAAAACAAAACAGAATGAAT) and R2 (CGCGGATCCTGCAGACGGTCCTTGATGTT), and self-cleavage was monitored by extension of the R2 primer end-labeled with [ $\gamma$ -<sup>32</sup>P]-ATP (Perkin-Elmer) and T4 polynucleotide kinase (NEB).

### **Supplementary References**

- Alva V, Nam S-Z, Söding J, Lupas AN. 2016. The MPI bioinformatics Toolkit as an integrative platform for advanced protein sequence and structure analysis. *Nucleic Acids Res* 44:W410-W415.
- Anders S, Pyl PT, Huber W. 2015. HTSeq—a Python framework to work with high-throughput sequencing data. *Bioinformatics* 31:166-169.
- Arkhipova I. 2006. Distribution and phylogeny of Penelope-like elements in eukaryotes. *Syst Biol* 55:875-885.
- Bao W, Kojima KK, Kohany O. 2015. Repbase Update, a database of repetitive elements in eukaryotic genomes. *Mob DNA* 6:11.
- Cervera A, De la Pena M. 2014. Eukaryotic penelope-like retroelements encode hammerhead ribozyme motifs. *Mol Biol Evol* 31:2941-2947.
- Darty K, Denise A, Ponty Y. 2009. VARNA: Interactive drawing and editing of the RNA secondary structure. *Bioinformatics* 25:1974-1975.
- Edgar RC. 2004. MUSCLE: a multiple sequence alignment method with reduced time and space complexity. *BMC Bioinformatics*. 5:113.
- Flot JF, Hespeels B, Li X, Noel B, Arkhipova I, Danchin EG, Hejnol A, Henrissat B, Koszul R, Aury JM, et al. 2013. Genomic evidence for ameiotic evolution in the bdelloid rotifer *Adineta vaga*. *Nature* 500:453-457.
- Geer LY, Domrachev M, Lipman DJ, Bryant SH. 2002. CDART: protein homology by domain architecture. *Genome Res* 12:1619-1623.
- Gladyshev E, Arkhipova IR. 2007. Telomere-associated endonuclease-deficient Penelope-like retroelements in diverse eukaryotes. *Proc Natl Acad Sci U S A* 104:9352-9357.
- Janssen S, Giegerich R. 2015. The RNA shapes studio. *Bioinformatics* 31:423-425.
- Kumar S, Stecher G, Tamura K. 2016. MEGA7: Molecular Evolutionary Genetics Analysis version 7.0 for bigger datasets. *Mol Biol Evol* 33:1870-1874.
- Langmead B, Salzberg SL. 2012. Fast gapped-read alignment with Bowtie 2. *Nat Meth* 9:357-359.
- Langmead B, Trapnell C, Pop M, Salzberg SL. 2009. Ultrafast and memory-efficient alignment of short DNA sequences to the human genome. *Genome Biol*. 10.
- Macke TJ, Ecker DJ, Gutell RR, Gautheret D, Case DA, Sampath R. 2001. RNAMotif, an RNA secondary structure definition and search algorithm. *Nucleic Acids Research* 29:4724-4735.
- Rodriguez F, Arkhipova IR. 2016. Multitasking of the piRNA silencing machinery: Targeting transposable elements and foreign genes in the bdelloid rotifer *Adineta vaga*. *Genetics* 203:255-268.
- Smith C, Heyne S, Richter AS, Will S, Backofen R. 2010. Freiburg RNA Tools: a web server integrating IntaRNA, ExpaRNA and LocARNA. *Nucleic Acids Res* 38:W373-W377.
- Sullivan MJ, Petty NK, Beatson SA. 2011. Easyfig: a genome comparison visualizer. *Bioinformatics* 27:1009-1010.
- Xiong Y, Eickbush TH. 1990. Origin and evolution of retroelements based upon their reverse transcriptase sequences. *The EMBO Journal* 9:3353-3362.
